# Supplementary material for: Surface features of TiO2 nanoparticles: combination modes of adsorbed CO probe the stepping of (101) facets
Source: Royal Society of Chemistry journal article supplement (doi:10.1039/c3cp51524a), 2013-01-01
Supplement: c3cp51524a.pdf [file c3cp51524a.pdf]

## SUPPLEMENTARY INFORMATION

### **Surface features of TiO<sub>2</sub> nanoparticles: combination modes of adsorbed CO probe the stepping of (101) facets**

**Chiara Deiana,<sup>a</sup> Gloria Tabacchi<sup>b</sup>, Valter Maurino,<sup>a</sup> Salvatore Coluccia,<sup>a</sup> Gianmario Martra<sup>a</sup> and Ettore Fois<sup>b</sup>**

<sup>a</sup> Department of Chemistry and Interdepartmental Centre of Excellence “Nanostructured Interfaces and Surfaces-NIS”, University of Torino, via P. Giuria 7, 10125 Torino, Italy.

<sup>b</sup> Department of Science and High Technology, University of Insubria and INSTM, via Lucini 3, 22100 Como, Italy.

---

**Table S1.** Relaxation energies of different low-index anatase surfaces (J/m<sup>2</sup>).

| Surface | (101)     | (100)     | (001)     | (110)     |
|---------|-----------|-----------|-----------|-----------|
| a)      | 0.28      | 0.36      | 0.39      | 0.40      |
| b)      | 0.49      | 0.58      | 0.98      | 1.15      |
| c)      | 0.60-0.65 | 0.75-0.80 | 1.25-1.30 | 1.30-1.35 |

a) Present results; b) from Ref. M. Lazzeri, A. Vittadini, A. Selloni, *Phys. Rev. B*, 2001, **63**, 155409; c) data extracted from Figure 1a in Ref. L. Mino, A.M. Ferrari, V. Lacivita, G. Spoto, S. Bordiga, A. Zecchina; *J. Phys. Chem. C*, 2011, **115**, 7694-7700.

### Comment to Table S1:

**Surface energies.** In table S1 the surface energies of low-index anatase surfaces from literature are reported and compared to the relaxation energies calculated in our work. Here the atoms of bottom TiO<sub>2</sub> layer of the slab models were fixed to the crystallographic positions (see text). The surface relaxation energy was calculated by:

$$E^{(hkl)} = \frac{E(\text{TiO}_2)^{\text{bulk}} - E(\text{TiO}_2)^{(hkl)}}{A(\text{TiO}_2)^{(hkl)}}$$

where,  $E(\text{TiO}_2)$  refers to the total energy per TiO<sub>2</sub> unit for the reference bulk and for the (hkl) slab, respectively.  $A$  refers to the area per Ti atom on a given surface and is calculated by dividing the slab area by the number of Ti sites in the surface layer. In our calculations, a system containing 36(TiO<sub>2</sub>) units was considered as reference bulk, corresponding to a 3×3×1 supercell.

For the (101) surface we considered 6 layers each consisting of 6(TiO<sub>2</sub>) units; 6 layers of 6(TiO<sub>2</sub>) units for the (100); 6 layers of 9(TiO<sub>2</sub>) units for the (001) and 8 layers of 6(TiO<sub>2</sub>) units for the (110) surfaces respectively. Exposed areas are 1.1627 nm<sup>2</sup>, 1.0803 nm<sup>2</sup>, 1.2894 nm<sup>2</sup> and 1.0185 nm<sup>2</sup> for the (101), (100), (001) and (110) surfaces, respectively. All calculations were performed according to the procedure reported in the main text, namely 80Ry cutoff, at  $\Gamma$  point using the PBE approximation. The literature data were obtained by relaxing all atoms in the slabs. Interestingly the surface relative stabilities have the same trends in all cases. Moreover, it is to be stressed that, in all cases, the (001) and the (110) surfaces have very similar energies.

**Table S2.** Assignment of the IR signals observed in the spectra of 45 mbar CO adsorbed on TiO<sub>2</sub> nanoparticles (ca. 100 K, P<sub>CO</sub> = 45 mbar, resulting in a full surface coverage, ref. S1.1) considered in the manuscript (TiO<sub>2</sub> P25, TiO<sub>2</sub> HT, TiO<sub>2</sub> HT-HF).

| vCO band [cm <sup>-1</sup> ] | Assignment                                                                                       | References        |
|------------------------------|--------------------------------------------------------------------------------------------------|-------------------|
|                              | <i>Adsorbing site</i>                                                                            | <i>References</i> |
| 2206 <sup>a</sup>            | α sites (notation as in ref. S1.2), i.e. Ti <sup>4+</sup> in coordinatively defective position   | S1.2, S1.3        |
| 2183 <sup>a</sup>            | Ti <sup>4+</sup> <sub>4c</sub> on (110) anatase surface                                          | S1.1              |
| 2179 <sup>b</sup>            | β sites (notation as in ref. S1.2), i.e. Ti <sup>4+</sup> <sub>5c</sub> on (101) anatase surface | S1.1              |
| 2164 <sup>b</sup>            | Ti <sup>4+</sup> <sub>5c</sub> on (100) or (001) anatase surface*                                | S1.1              |
| 2156 <sup>c</sup>            | -OH groups                                                                                       | S1.2              |
| 2149 <sup>a</sup>            | rutile surfaces                                                                                  | S1.4              |
| 2139                         | physisorbed CO                                                                                   | S1.2, S1.5        |
| 2127 <sup>b</sup>            | <sup>13</sup> CO on β sites                                                                      | S1.1, S1.2, S1.5  |

**Comment to Table S2:**

<sup>a</sup> Signal present only for TiO<sub>2</sub> P25

<sup>b</sup> Signal downshifted of 1 cm<sup>-1</sup> in TiO<sub>2</sub> HT and TiO<sub>2</sub> HT-HF

<sup>c</sup> Signal upshifted of 1 cm<sup>-1</sup> in TiO<sub>2</sub> HT and TiO<sub>2</sub> HT-HF

\* This band is usually assigned to the stretching of CO adsorbed on Ti<sup>4+</sup> exposed at the (001) anatase surfaces (ref. S1.2). However, our recent theoretical calculations suggested that it should be due to CO on Ti<sup>4+</sup> exposed at (100) anatase surfaces (ref. S1.1).

**References**

- S1.1. C. Deiana, M. Minella, G. Tabacchi, V. Maurino, E. Fois and G. Martra, *Physical Chemistry Chemical Physics*, 2013, **15**, 307-315.  
S1.2. K. Hadjiivanov, J. Lamotte and J. C. Lavalley, *Langmuir*, 1997, **13**, 3374-3381.  
S1.3. C. Deiana, E. Fois, S. Coluccia and G. Martra, *Journal of Physical Chemistry C*, 2010, **114**, 21531-21538.  
S1.4. L. Mino, G. Spoto, S. Bordiga and A. Zecchina, *Journal of Physical Chemistry C*, 2012, **116**, 17008-17018.  
S1.5. G. Spoto, C. Morterra, L. Marchese, L. Orto and A. Zecchina, *Vacuum*, 1990, **41**, 37-39.

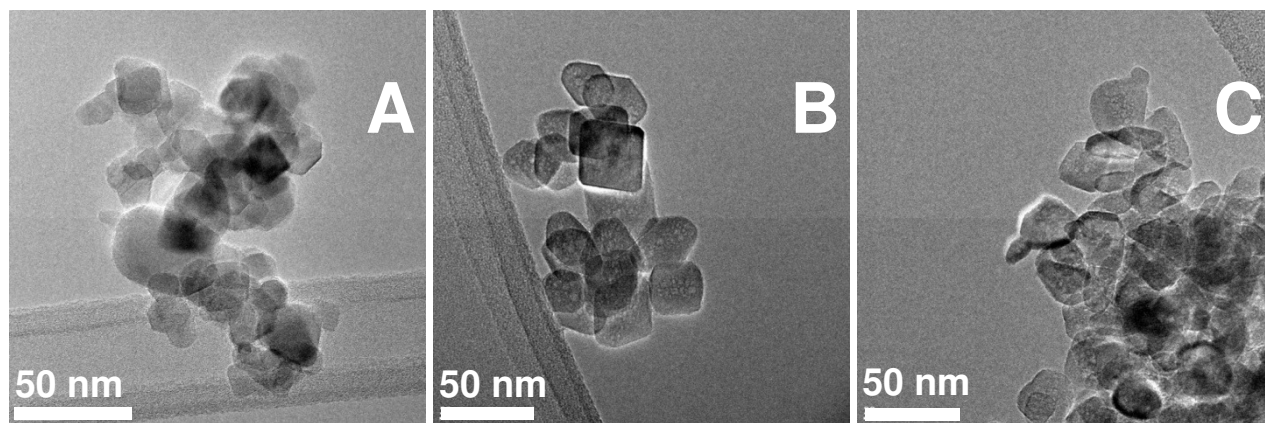

**Figure S1.** TEM images representative of the overall morphology of: A) TiO<sub>2</sub> P25 (original magnification 120k ×); B) TiO<sub>2</sub> HT (original magnification 100k ×); C) TiO<sub>2</sub> HT-HF (original magnification 100k ×). In panel B, the square-like shape can be due to a truncated bipyramid particle with the (101) type facets parallel to the line-of-sight (corresponding to the direction of the impinging electron beam).

#### References

- S2.1. M. Čaplovičová, P. Billik, L. Čaplovič, V. Brezová, T. Turáni, G. Plesch, P. Fejdi, *Applied Catalysis B: Environmental*, 2012, 117-118, 224-235.
- S2.2. C. Deiana, M. Minella, G. Tabacchi, V. Maurino, E. Fois and G. Martra, *Physical Chemistry Chemical Physics*, 2013, **15**, 307-315.

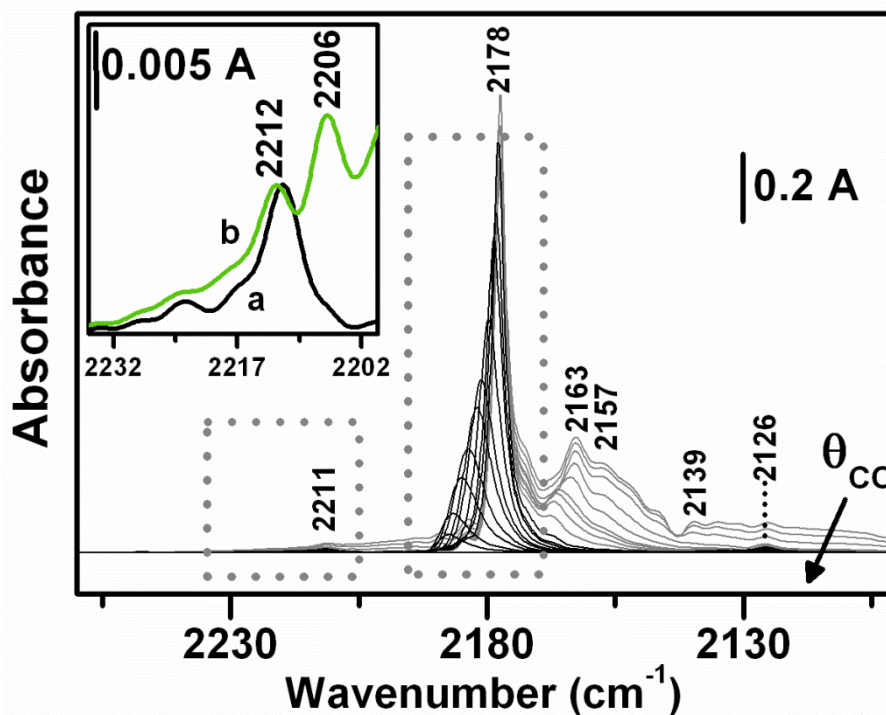

**Figure S2.** IR spectra of decreasing amount (in the sense of the arrow) of CO adsorbed at ca. 100 K on TiO<sub>2</sub> HT outgassed at 873 K. Spectra collected in conditions ranging from the presence of 45 to 0.1 mbar and from 0.06 mbar to outgassing for 10 minutes at ca. 100 K: grey and black curves, respectively. The dashed frames mark the spectral regions displayed in Figure 3 in the main text. Inset: IR spectra, in the 2235-2200 cm<sup>-1</sup> range, obtained by admitting 0.06 mbar CO at 100 K on TiO<sub>2</sub> HT-HF (curve a) and 0.1 mbar CO at 100 K on TiO<sub>2</sub> P25 (curve b) outgassed at 873 K. The two curves have been normalized to the maximum of the band at 2212 cm<sup>-1</sup>.

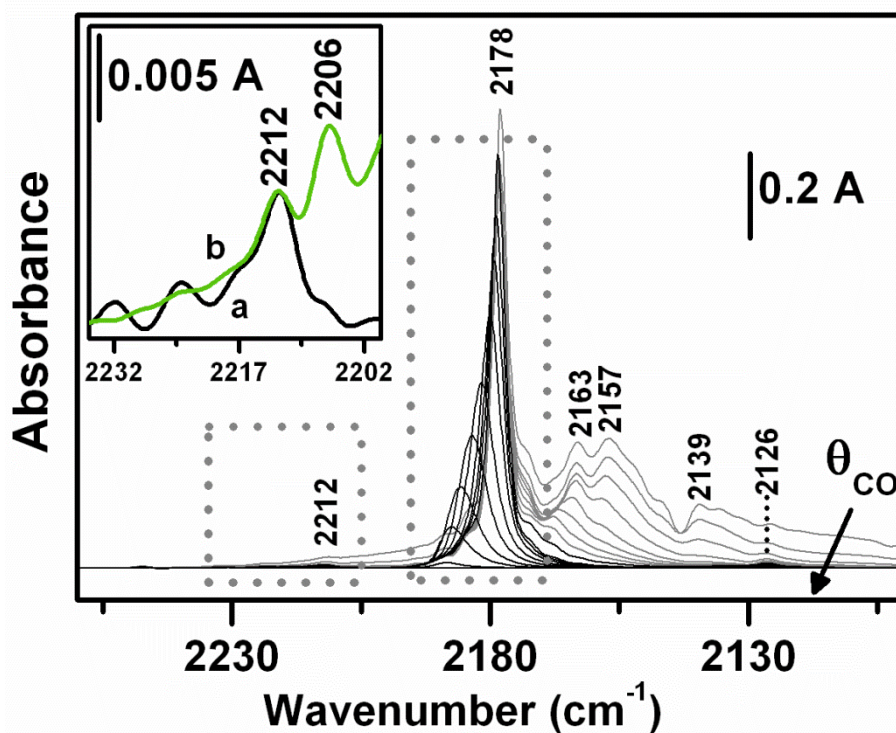

**Figure S3.** IR spectra of decreasing amount (in the sense of the arrow) of CO adsorbed at ca. 100 K on TiO<sub>2</sub> HT-HF outgassed at 873 K. Spectra collected in conditions ranging from the presence of 45 to 0.1 mbar and from 0.07 mbar to outgassing for 10 minutes at ca. 100 K: grey and black curves, respectively. The dashed frames mark the spectral regions displayed in Figure 4 in the main text. Inset: IR spectra, in the 2235-2200 cm<sup>-1</sup> range, obtained by admitting 0.07 mbar CO at 100 K on TiO<sub>2</sub> HT-HF (curve a) and 0.1 mbar CO at 100 K on TiO<sub>2</sub> P25 (curve b) outgassed at 873 K. The two curves have been normalized to the maximum of the band at 2212 cm<sup>-1</sup>.



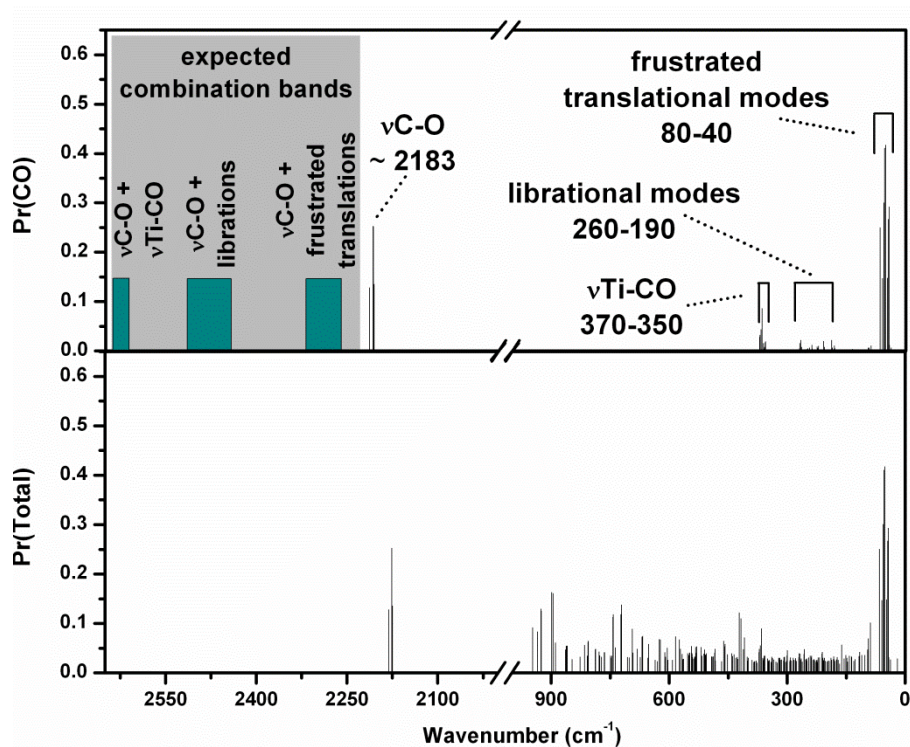

**Figure S4.** Calculated Participation Ratio (PR) for a  $\theta = 1$  coverage of CO on (110) TiO<sub>2</sub> anatase slab. Bottom panel: PR obtained by including all the atoms in the system. Top panel: PR obtained by taking into account just the CO atoms.

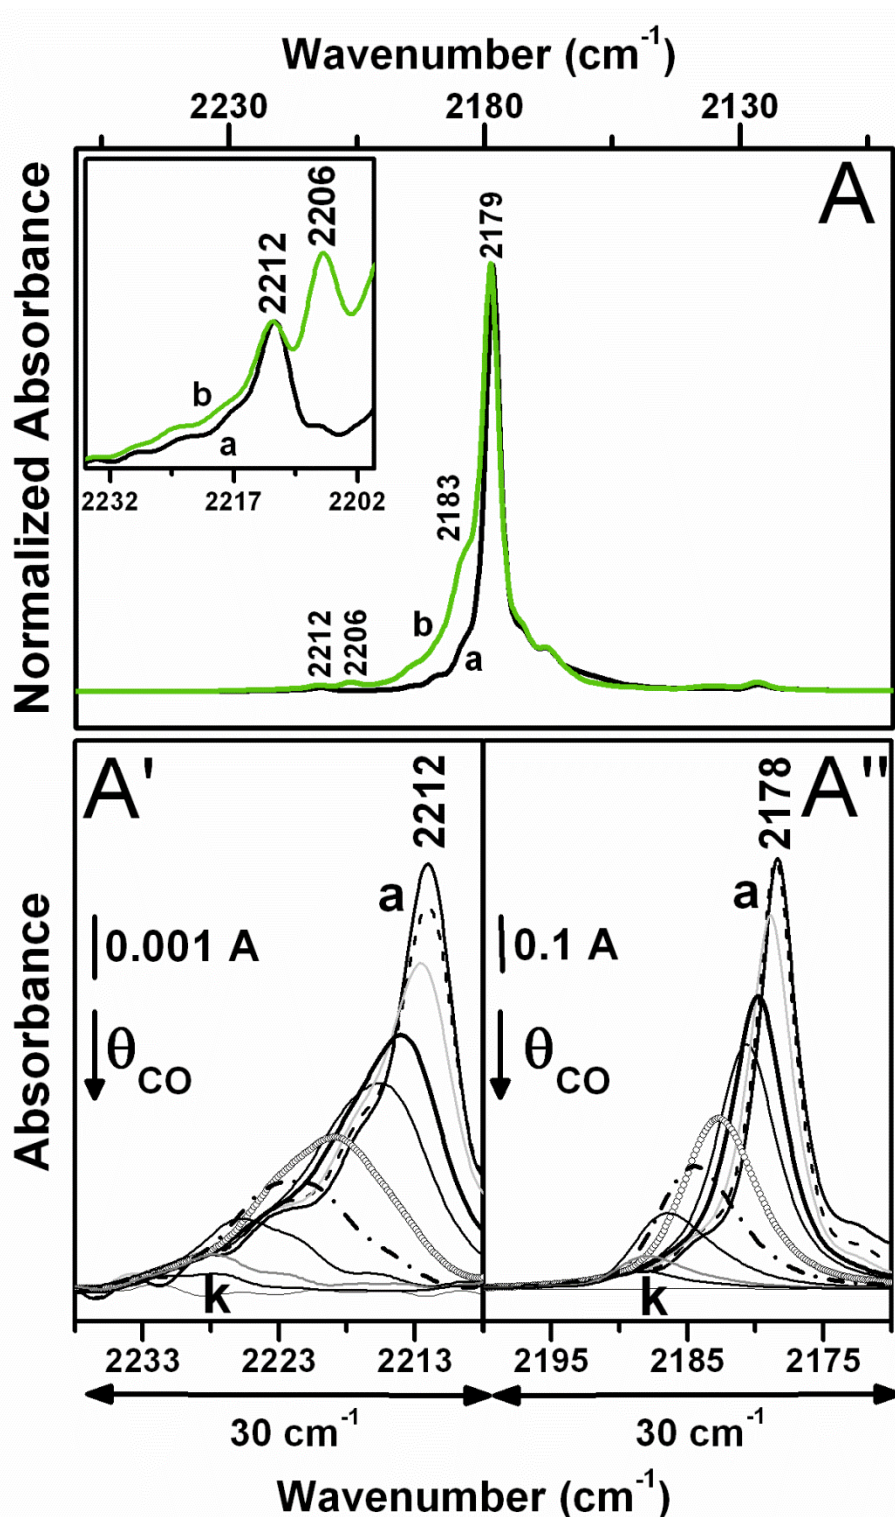

**Figure S5.** Panel A ( $2260\text{-}2100\text{ cm}^{-1}$  range): IR spectra (normalized to the maximum of the peak at  $2179\text{ cm}^{-1}$ ) obtained by admitting  $0.1\text{ mbar}$  CO at  $100\text{ K}$  on  $\text{TiO}_2\text{ P25}$  outgassed at  $573$  (curve a) and  $873\text{ K}$  (curve b); inset: zoomed view of the  $2235\text{-}2200\text{ cm}^{-1}$ . Panels A' and A'': IR spectra in the  $2238\text{-}2008\text{ cm}^{-1}$  and  $2200\text{-}2170\text{ cm}^{-1}$  range, respectively, of decreasing amount of CO adsorbed at ca.  $100\text{ K}$  on  $\text{TiO}_2\text{ P25}$  outgassed at  $573\text{ K}$ . Spectra collected in conditions ranging from the presence of  $0.1\text{ mbar}$  to outgassing for  $10$  minutes at ca.  $100\text{ K}$ . Decreasing CO coverages are in the sense of lettering.
